# Supplementary material
Source: PubMed Central journal article supplement (PMC4155578)
Supplement: NIHMS619821-supplement-04.pdf [file NIHMS619821-supplement-04.pdf]

**Movie S1. Inhibition of muscarinic signaling promotes a ductal phenotype, related to Figure 2.** Increased ductal development under inhibition of muscarinic signaling with 4-DAMP. Time-lapse imaging shows E13 SMG cultured without (left panel) or with (right panel) 10 $\mu$ M 4-DAMP for 24h. Images were captured every 20 minutes (Zeiss Axiovert 40c with Infinity CCD camera).

**Movie S2. Microlumens are present in developing SMG, related to Figure 3 and 5.** Rotation of 3D projection of presumptive ducts showing ZO1(+) microlumens that will fuse to form a single lumen. Samples were imaged using a Leica Sp5 LSM confocal microscope. Image is a 30 $\mu$ m stack of 0.8 $\mu$ m section.

## Supplemental Materials and Methods

### Materials

FGFR2b-Fc chimera was from R&D systems (Minneapolis, MN, US). The pan-caspase inhibitor Z-VAD-FMK was from Tocris (Minneapolis, MN, US). Antibodies: goat anti-VIPR1 (N17, 1:100; Santa Cruz Biotech Ltd) and anti-CFTR (M3A7, 1:50; Chemicon (Doucet et al., 2003).

### Mouse lines

Strain used on this study: *Fgf10*<sup>tm1Wss</sup> was provided by Dr. Ophir Klein, UCSF.CA (Min et al., 1998). Salivary glands of heterozygous embryos were analyzed at E17.

### RNA interference

RNA interference was performed using 2 siRNAs for *Vipr1* (J-065007-05-0005 and J-065007-06-0005), a non-silencing scrambled siRNA (Dharmacon, CA) and RNAiFect reagent (Qiagen, CA). Transfection and analysis of knockdown by qPCR and quantitative immunofluorescent analysis have been previously described (Rebustini et al., 2007).

| Gene         | Primers for Sybr Green qPCR                                                                |
|--------------|--------------------------------------------------------------------------------------------|
| <i>Vip</i>   | sense 5'- AACAGAGCAGAACAGATAATCAGT-3',<br>antisense 5'-GCAAAGCCTAATGGG AGAGAT-3'           |
| <i>Vipr1</i> | sense 5'- AAGTCATTGTAGAGGCAGAT-3',<br>antisense 5'-AATATGTCAAGACGGAATCAG-3'                |
| <i>Chat</i>  | sense 5' - GTGGAAGAATCGTCATCTCATCA<br>antisense 5' - GAA CTC AAG GAA GAC TGT GCT AT        |
| <i>Ret</i>   | sense 5' - ACA CGG TGG TAG CCA CTG AC<br>antisense 5' - GCG CCT CTT GTT TAC TGC AC         |
| <i>Syn2</i>  | sense 5' - TAG ACT GCT GTG GAG GTG AA<br>antisense 5' - GCT CTG AAA GGT AAA GGT AAC TG     |
| <i>Vacht</i> | sense 5' – GAGTGGGAGATGGGCATGGTTTGG<br>antisense 5' – GCAGGC AGGTACGACGCAAGA G             |
| <i>Rsp29</i> | sense 5'- GGAGTCACCCACGGAAGTTCCG-3',<br>antisense 5' – GGAAGCACTGGCGGCACATG-3'             |
| <i>Chrm1</i> | sense 5' - TCCCAAGGCTCACCCAGATGTC<br>antisense 5'- GCTCTGTGTGCTTTATTCTGTTGTTTCC            |
| <i>Etv4</i>  | sense 5' - GGTCCTGTGTTCTTGGTGCTGTG<br>antisense 5'- GGTCCTGTGTTCTTGGTGCTGTG                |
| <i>Etv5</i>  | sense 5' - AAGCCCTTCAAAGTGATAGCGGAGAC<br>antisense 5'- GTGTCCACAAACTTCCTCTTTCTGTCAATC      |
| <i>Fgf10</i> | sense 5' - TCTTCCTCCTCCTCGTCCTTCTCCTCTCCTTCC<br>antisense 5'- CCGCTGACCTTGCCGTTCTTCTCAATCG |
| <i>Nrtn</i>  | sense 5' - CGTACCACACGCTGCAAGAG<br>antisense 5'- TCCCACACTTATGTGAAGTCAGTTCTC               |
| <i>Tubb3</i> | sense 5' - CCAGAGCCATCTAGCTACTGACACTG<br>antisense 5'- AGAGCCAAGTGGACTCACATGGAG            |
| <i>Cdh1</i>  | sense 5' - GACTGGAGTGCCACCACCAAAGAC<br>antisense 5'- CGCCTGTGTACCCTCACCATCGG               |

Primer efficiencies were performed prior to use and were in the range of 90-100%

## Supplemental References

Doucet, L., Mendes, F., Montier, T., Delepine, P., Penque, D., Ferec, C., and Amaral, M.D. (2003). Applicability of different antibodies for the immunohistochemical localization of CFTR in respiratory and intestinal tissues of human and murine origin. *The journal of histochemistry and cytochemistry : official journal of the Histochemistry Society* 51, 1191-1199.

Min, H., Danilenko, D.M., Scully, S.A., Bolon, B., Ring, B.D., Tarpley, J.E., DeRose, M., and Simonet, W.S. (1998). Fgf-10 is required for both limb and lung development and exhibits striking functional similarity to *Drosophila* branchless. *Genes & development* 12, 3156-3161.

Rebustini, I.T., Patel, V.N., Stewart, J.S., Layvey, A., Georges-Labouesse, E., Miner, J.H., and Hoffman, M.P. (2007). Laminin alpha5 is necessary for submandibular gland epithelial morphogenesis and influences FGFR expression through beta1 integrin signaling. *Developmental biology* 308, 15-29.
